# Supplementary material
Source: Springer Nature journal article supplement (https://www.springermedizin.de/resource/supplementary/12877_2006_72_MOESM1_ESM.pdf/9441168)

### A. Perforated peptic ulcer

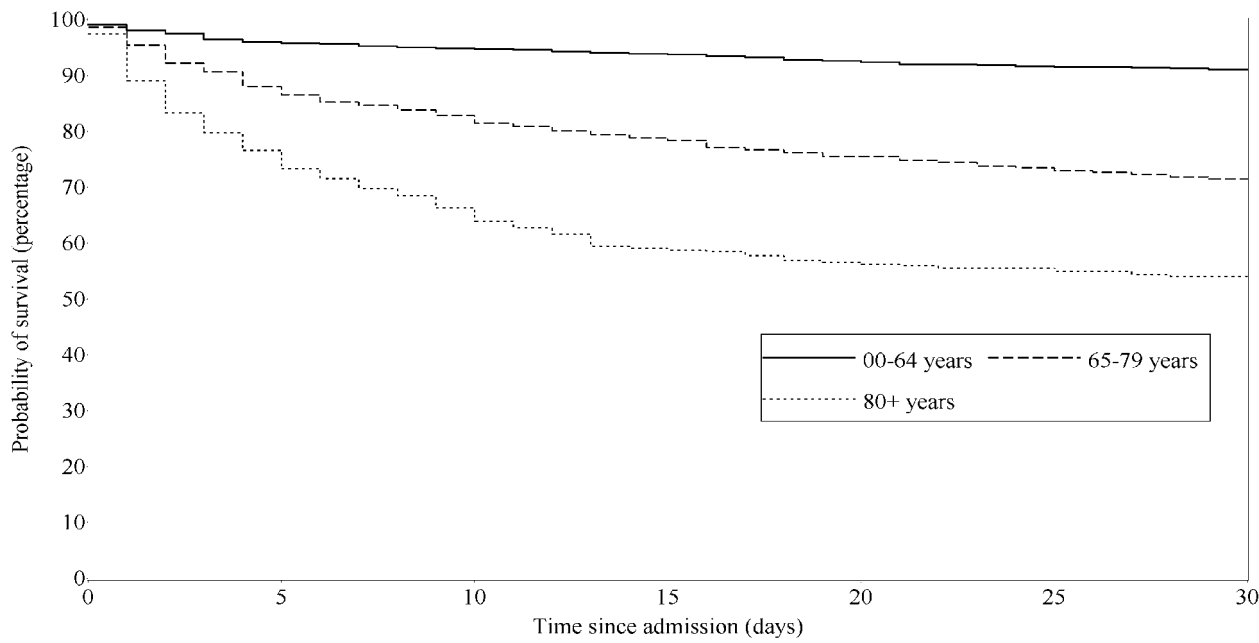

### B. Bleeding peptic ulcer

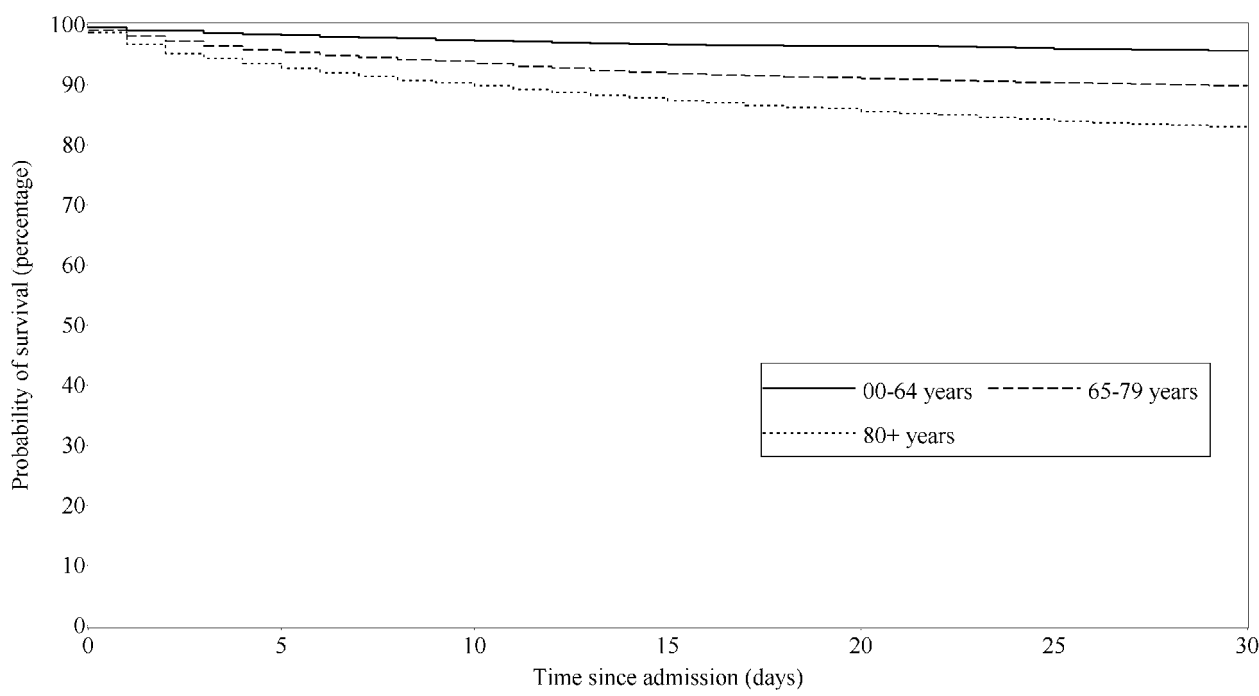

Supplement: MOESM1 [file 9441168]
